# Supplementary material for: (100) surface-exposed CeO2nanocubes as an efficient heterogeneous catalyst in the tandem oxidation of benzyl alcohol, para-chlorobenzyl alcohol and toluene to the corresponding aldehydes selectively
Source: Royal Society of Chemistry journal article supplement (doi:10.1039/c4ta06547f), 2015-01-01
Supplement: c4ta06547f1.pdf [file c4ta06547f1.pdf]

## Electronic Supplementary Information (ESI)

### **(100) surface exposed CeO<sub>2</sub> Nanocube as Efficient Heterogeneous Catalyst in Tandem Oxidation of Benzyl Alcohol, *para*-Chlorobenzyl Alcohol and Toluene to Corresponding Aldehydes Selectively**

Kalyanjyoti Deori, Chinmoy Kalita, Sasanka Deka\*

Department of Chemistry, University of Delhi, North campus, Delhi-110007, India

Email: [sdeka@chemistry.du.ac.in](mailto:sdeka@chemistry.du.ac.in), [ssdeka@gmail.com](mailto:ssdeka@gmail.com)

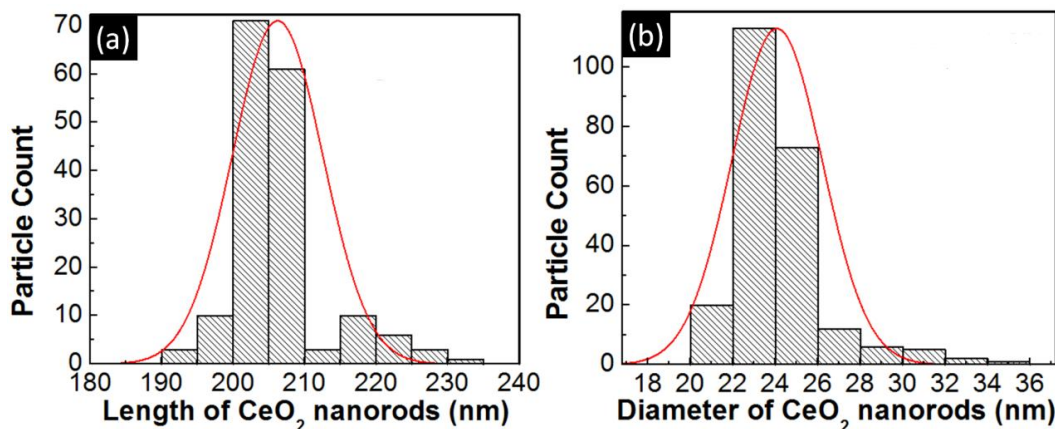

**Figure S1.** Particle size distribution histogram of as synthesized CeO<sub>2</sub> nanorods. (a) Length and (b) diameter distribution of nanorods

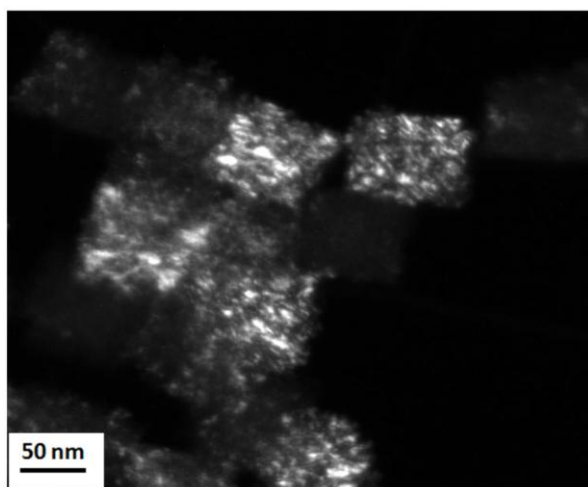

**Figure S2.** Dark field TEM image of ceria nanocube sample.

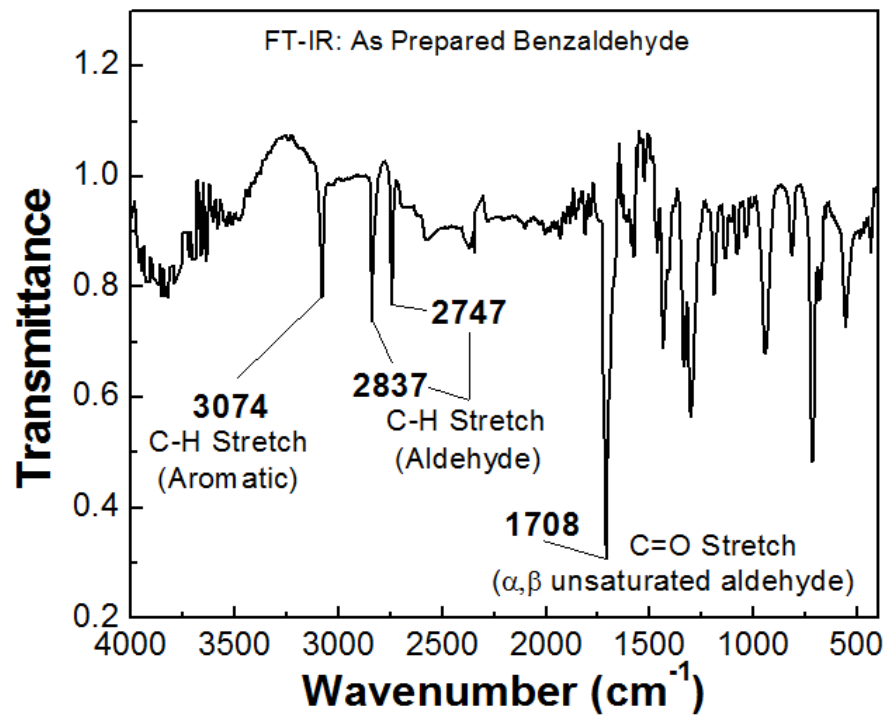

**Figure S3.** FT-IR spectrum of as prepared benzaldehyde in the reaction condition of 1 mmol benzyl alcohol, 10 mL water and 10 mg CNC in the presence of molecular oxygen at 35°C and 1 bar for 30 minutes.

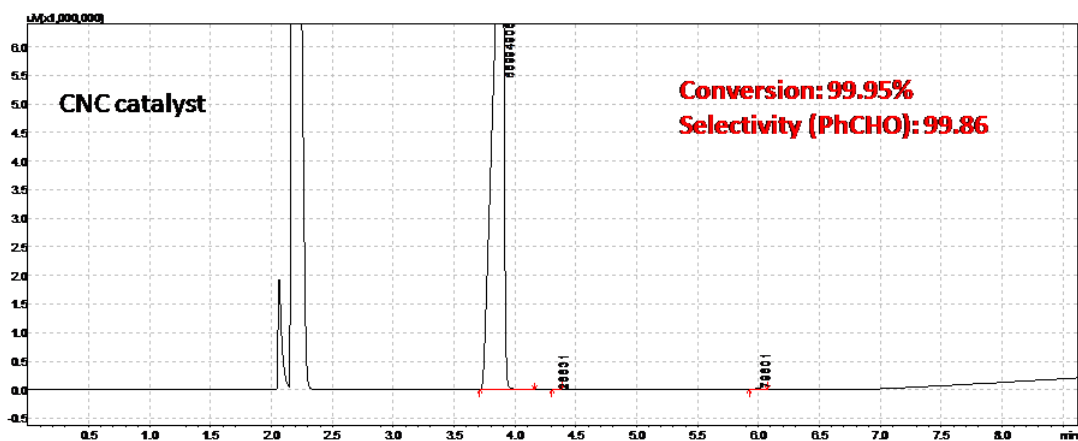

**Figure S4.** GC chromatograph of the reaction product obtained from benzyl alcohol oxidation with CNC catalyst at 35 °C for 30 minutes in the reaction condition of 1 mmol benzyl alcohol and 10 mL water in the presence of molecular oxygen at 35 °C.

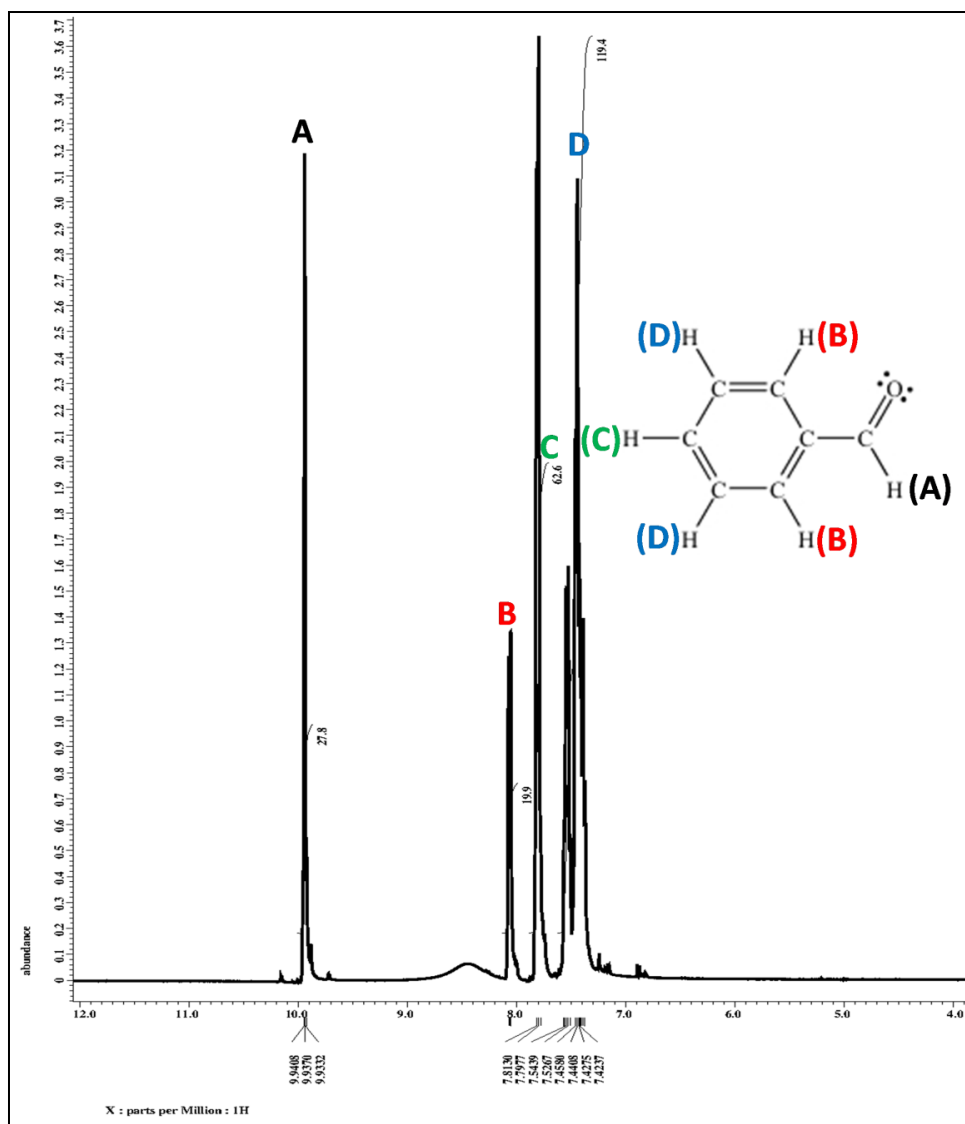

**Figure S5.** NMR spectrum of the reaction product obtained from benzyl alcohol oxidation with CNC catalyst at 35 °C for 30 minutes in the reaction condition of 1 mmol benzyl alcohol and 10 mL water in the presence of molecular oxygen.

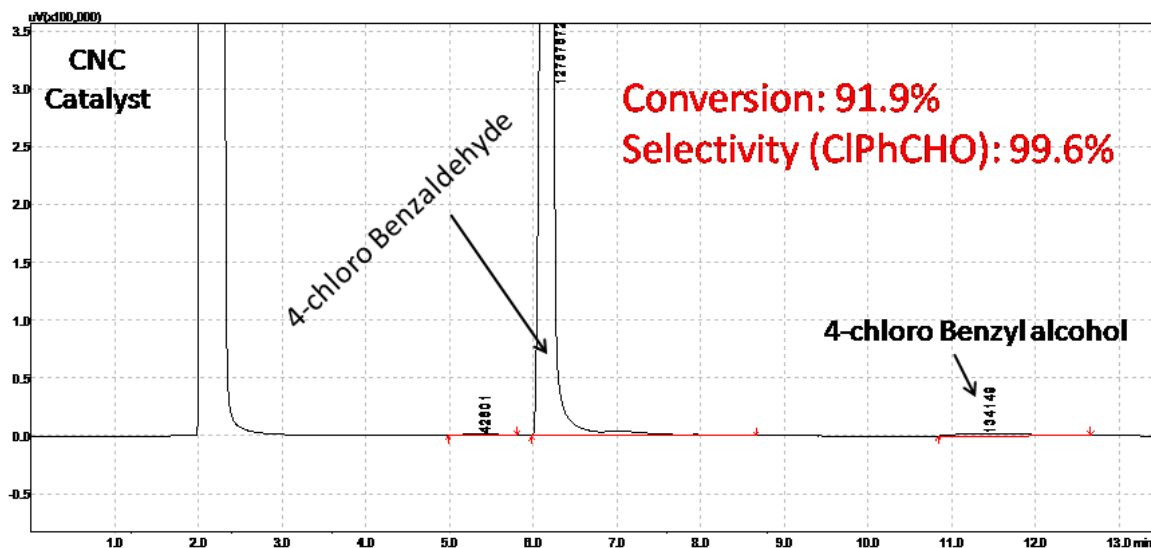

**Figure S6.** GC chromatograph of the reaction product obtained from *para*-chlorobenzyl alcohol oxidation with CNC catalyst at 35 °C for 1 hour in an optimum reaction condition of 1 mmol PCBA and 10 mL chloroform in the presence of 0.05 mmol H<sub>2</sub>O<sub>2</sub>.

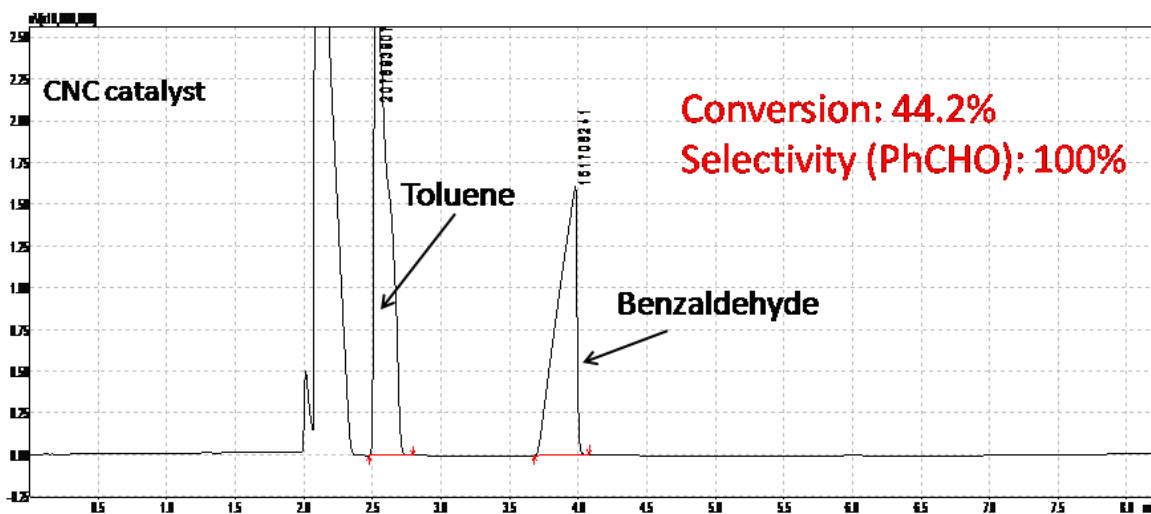

**Figure S7.** GC chromatograph of the reaction product obtained from toluene oxidation with CNC catalyst at 90 °C for 12 hours in the reaction condition of 1 mmol toluene and 10 mL water in the presence of molecular oxygen.

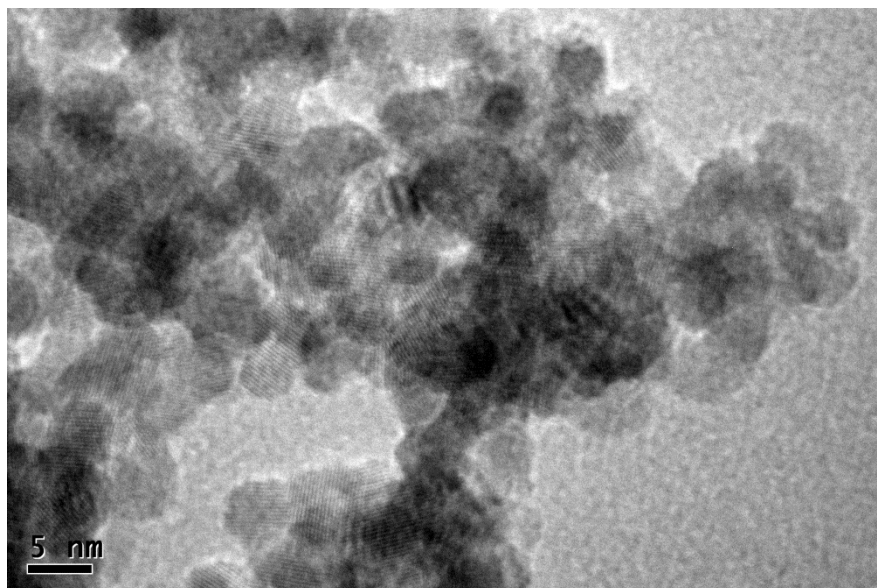

**Figure S8.** TEM image of as synthesized CeO<sub>2</sub> nanoparticles under the similar reaction condition as described in experimental section however without the use of oleic acid.
